# Supplementary material
Source: MDPI journal article supplement (https://www.mdpi.com/2072-4292/11/3/215)

Figure S1. Average reflectance of eucalypt tree (solid line), non-eucalypt tree and grass (dashed lines) at eight spectral bands from the WorldView-2 image at 2 m spatial resolution.

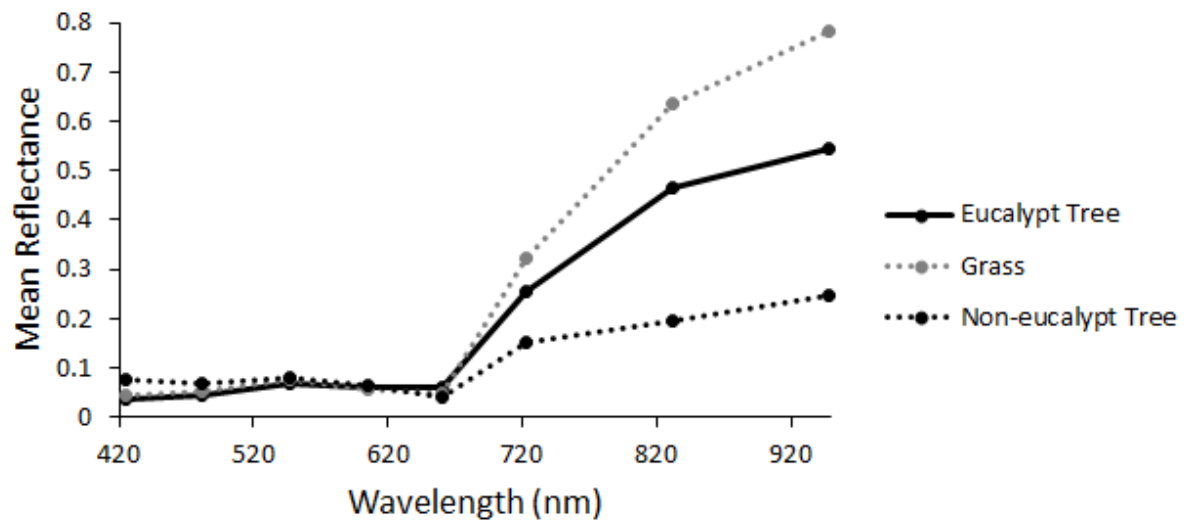

Figure S2. Coefficients of determination for quantile regression for 30 values of quantiles (from 0.970 to 0.999), where  $y$  is the frequency of koala tree use and  $x$  is estimated DigN concentration from WorldView-2 spectra.

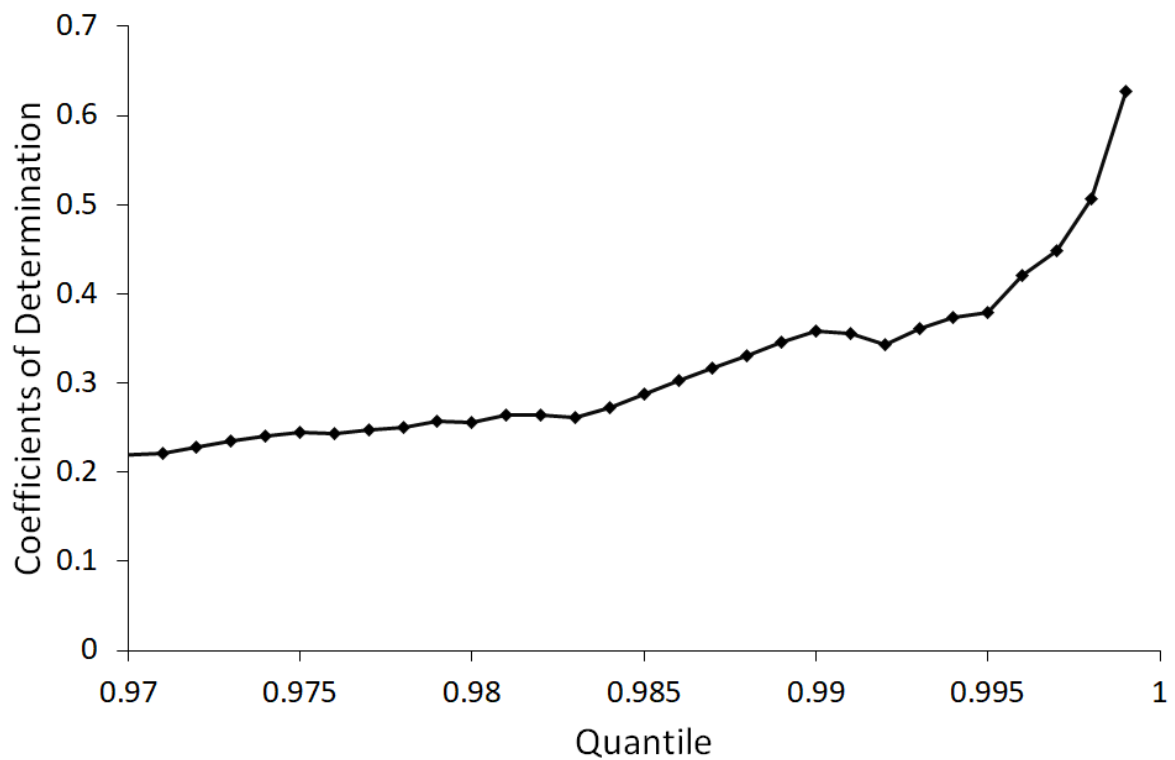

Supplement: s1 [file s1]
